# Supplementary material
Source: PubMed Central journal article supplement (PMC7781299)
Supplement: NIHMS1652010-supplement-Supplementary_Table_1.pdf [file NIHMS1652010-supplement-Supplementary_Table_1.pdf]

# Branch

# Supplementary Table 1. Table of Pedigrees

First Two Generations

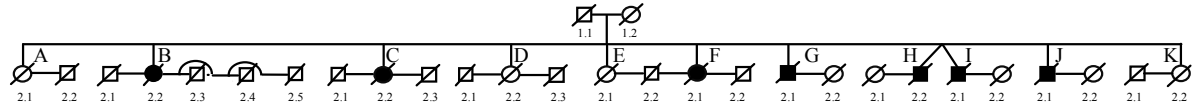

A1

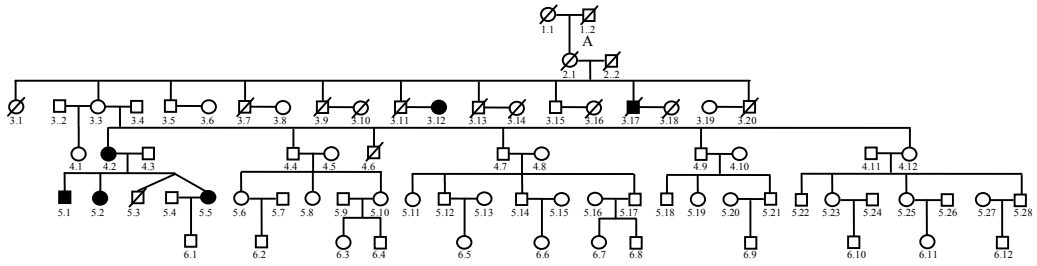

A2

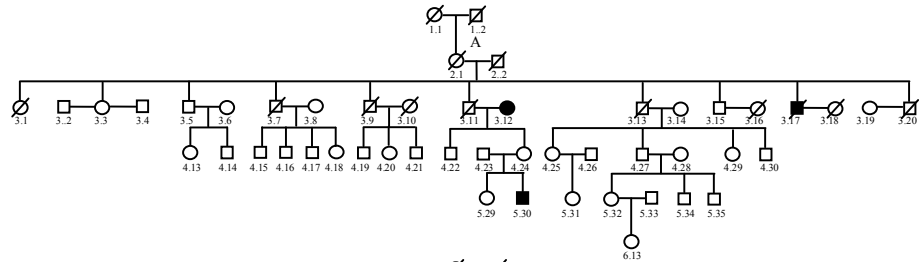

A3

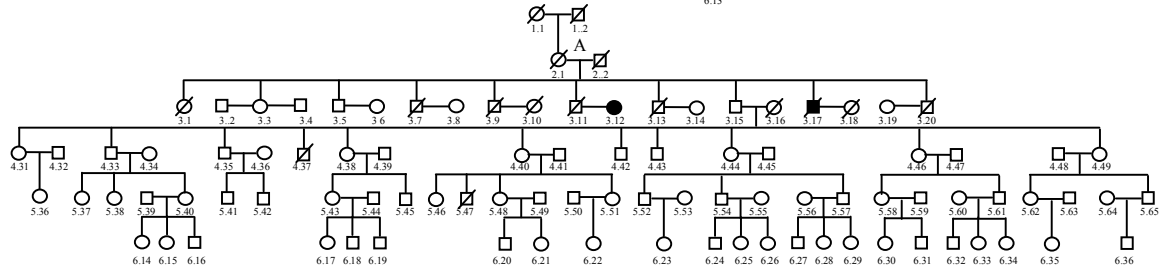

A4

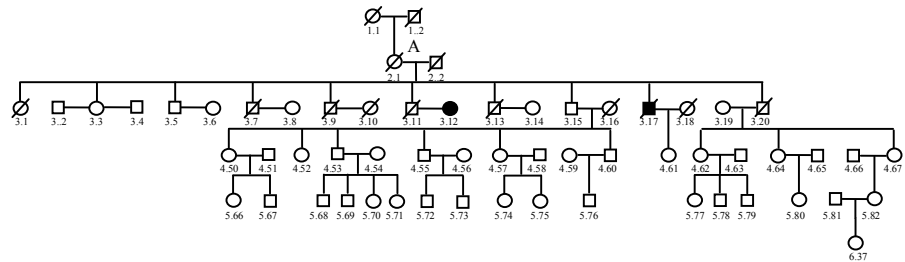

A5

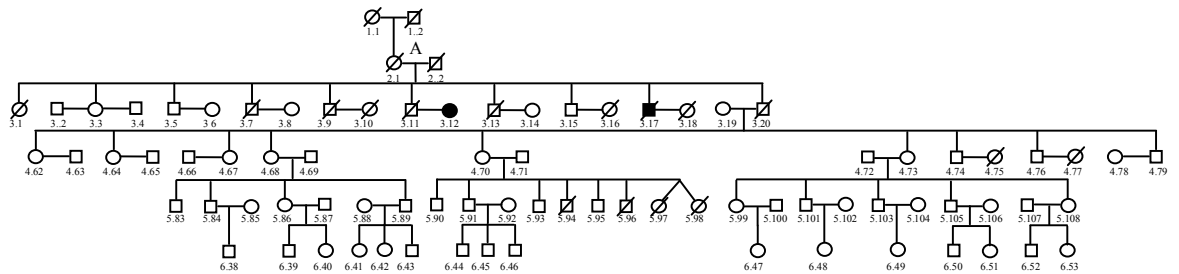

A6

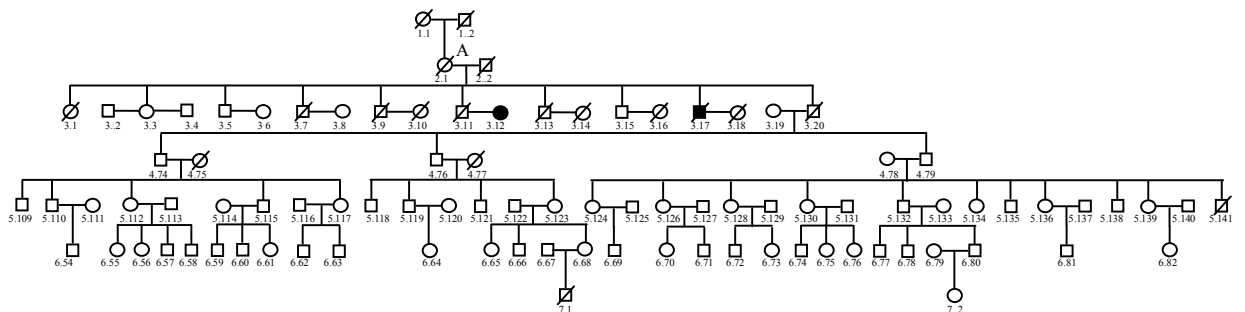

A2.2 = C3.4, A3.11 = C4.3, A3.12 = C4.10 = H4.24

# Branch

B1

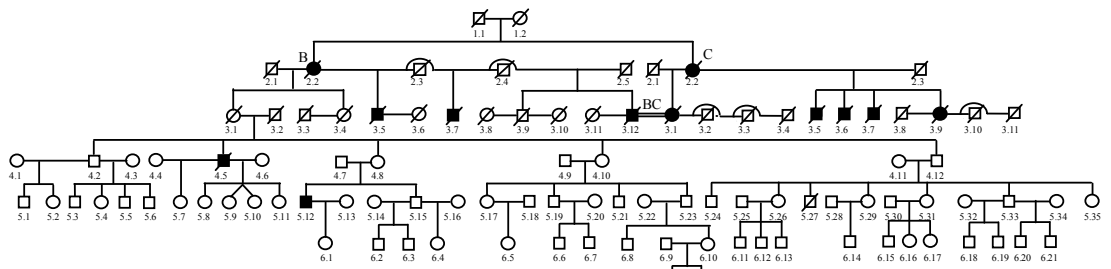

B2

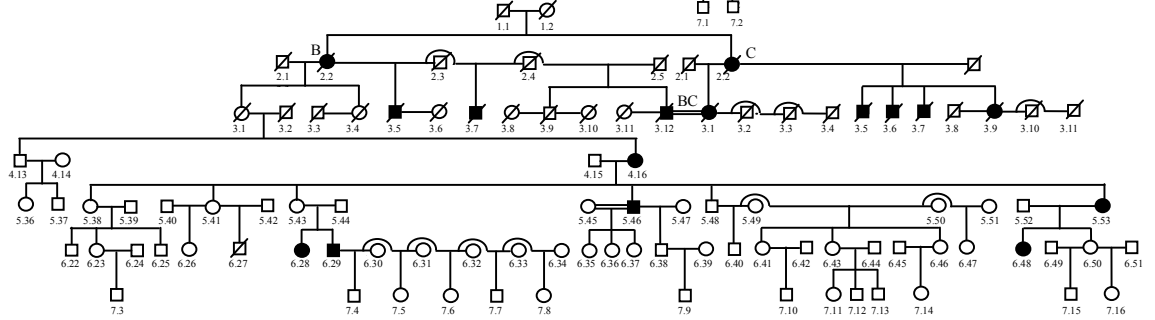

B3

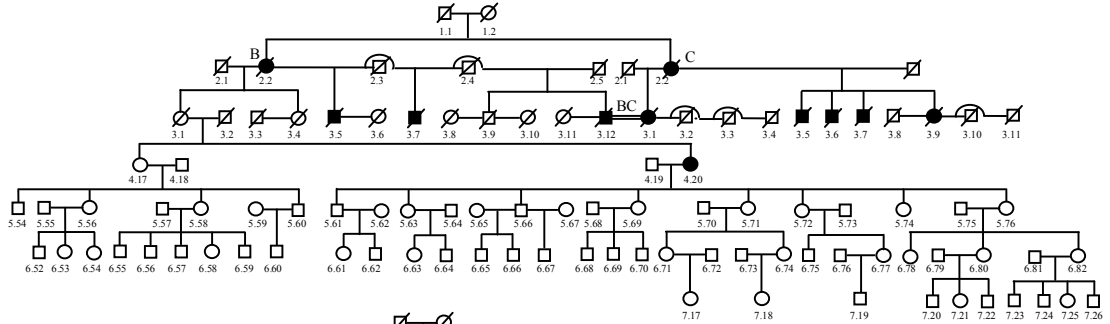

B4

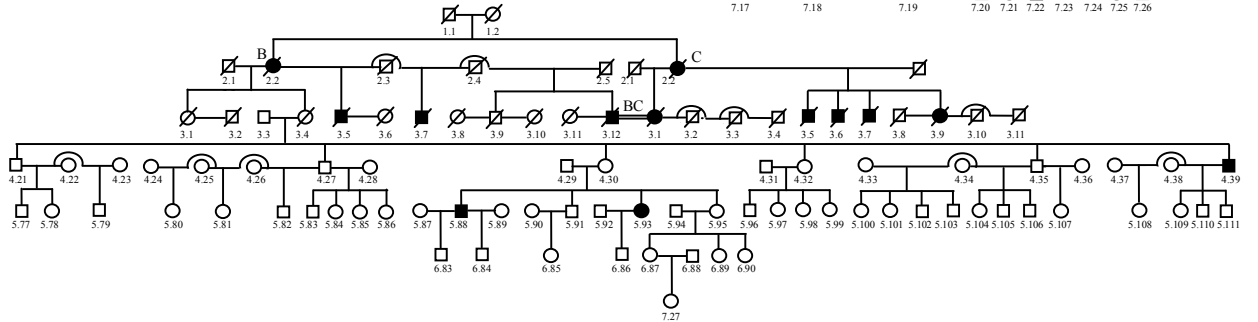

B5

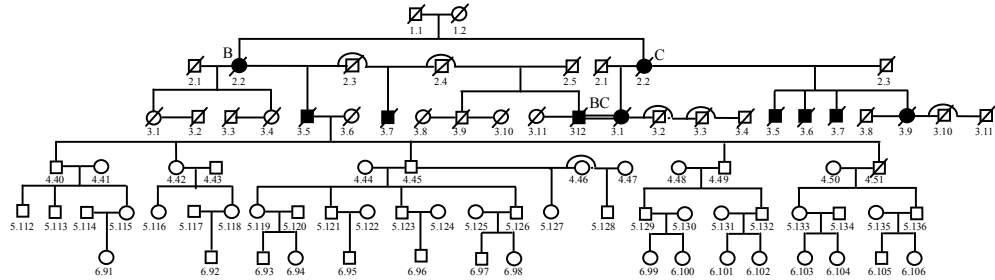

B6

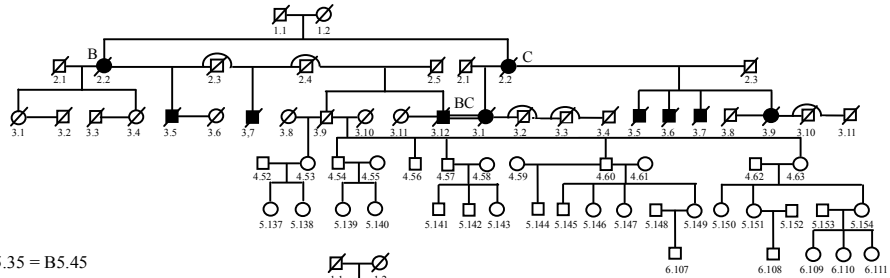

B2.3 = K2.1, B5.35 = B5.45

B7

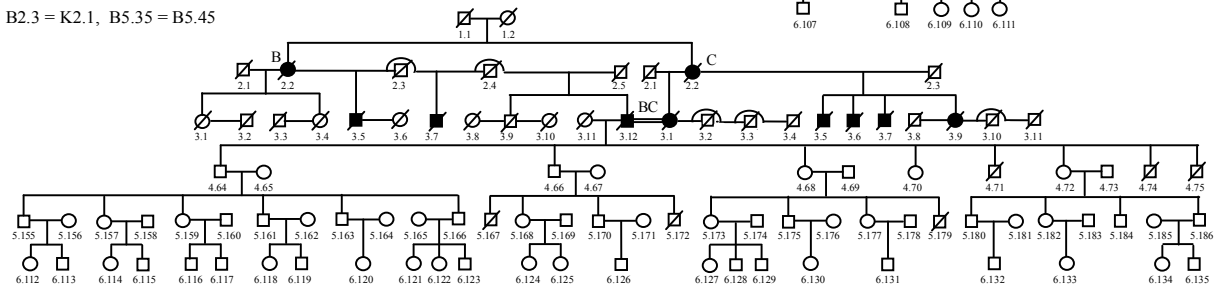

Branch

BC

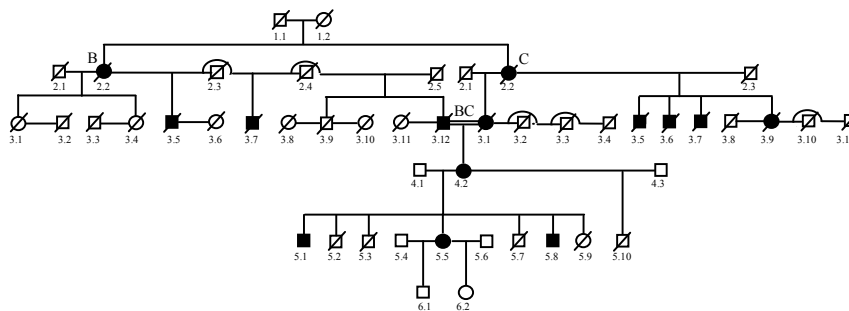

C1

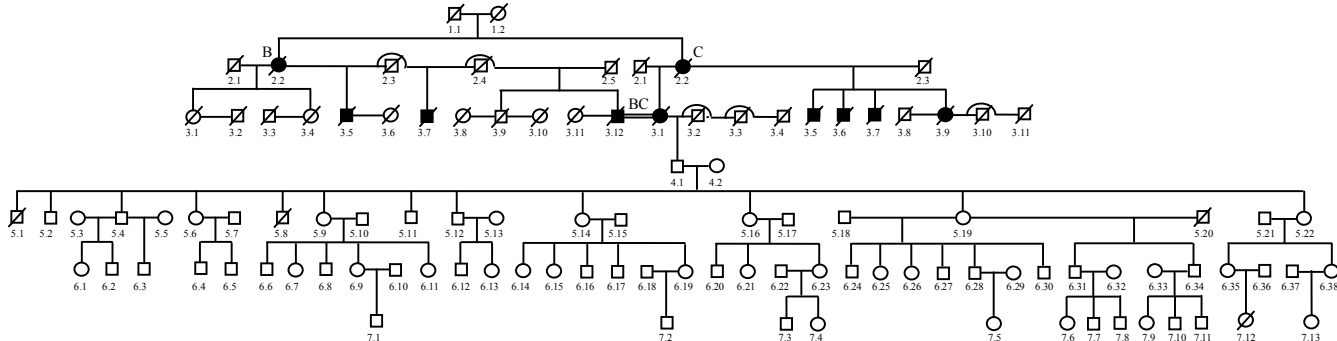

C2

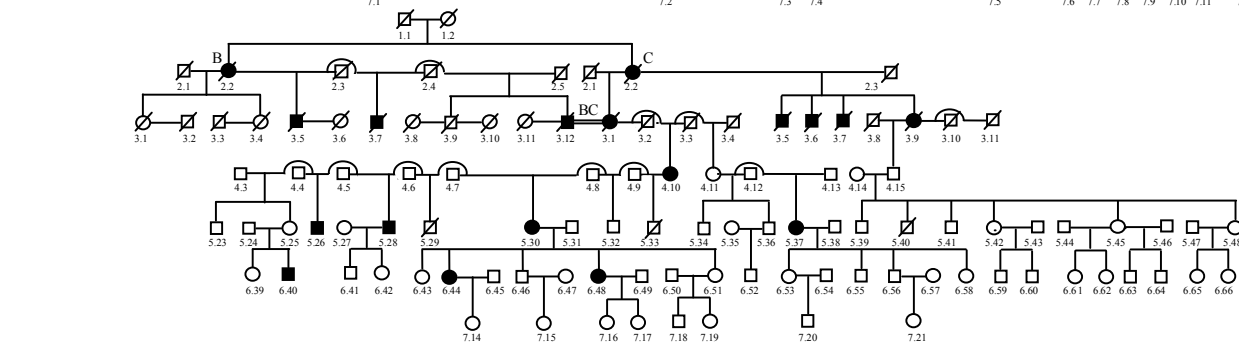

C3

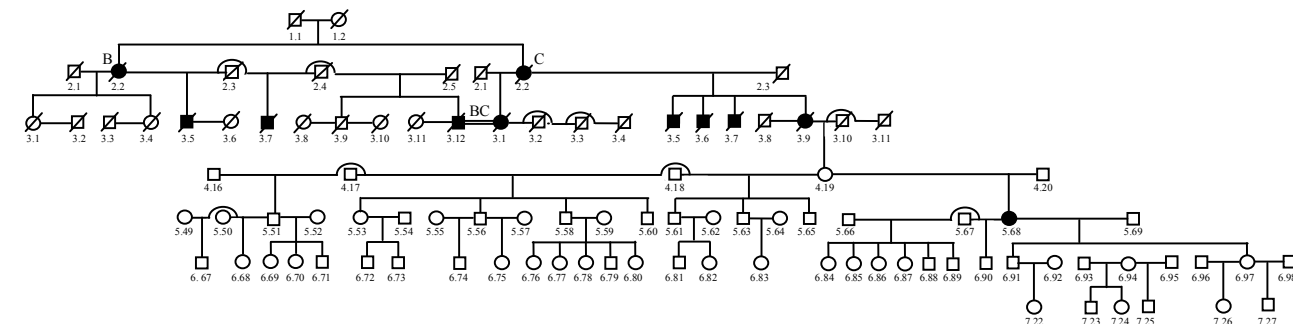

C4

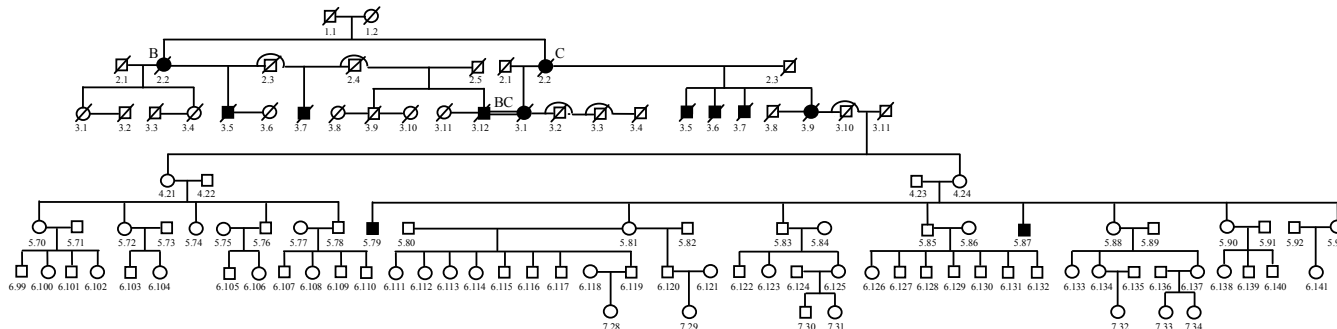

D1

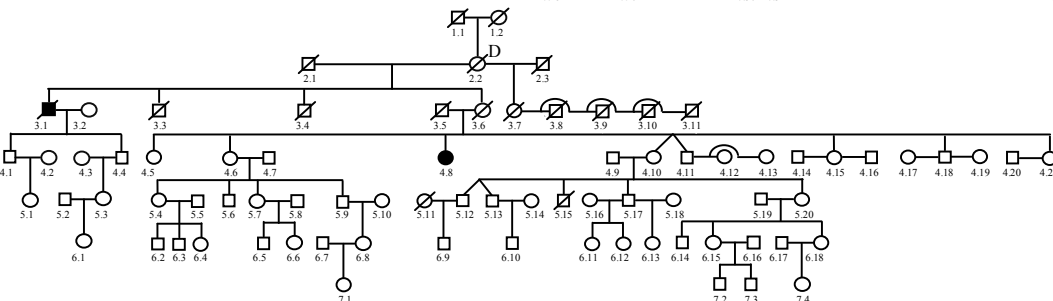

C3.4 = A2.2 C4.3 = A3.11 C4.6 = H4.25 C4.10 = H4.24 = A3.12

D2

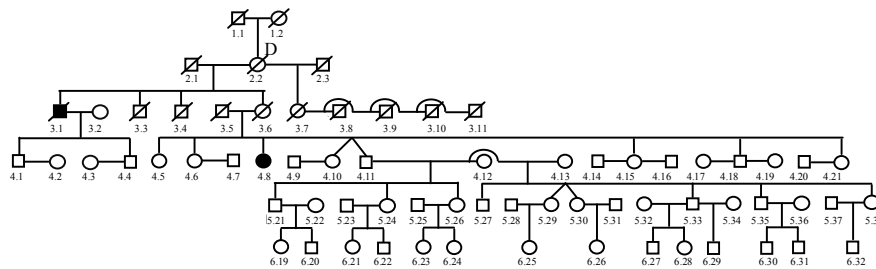

D3

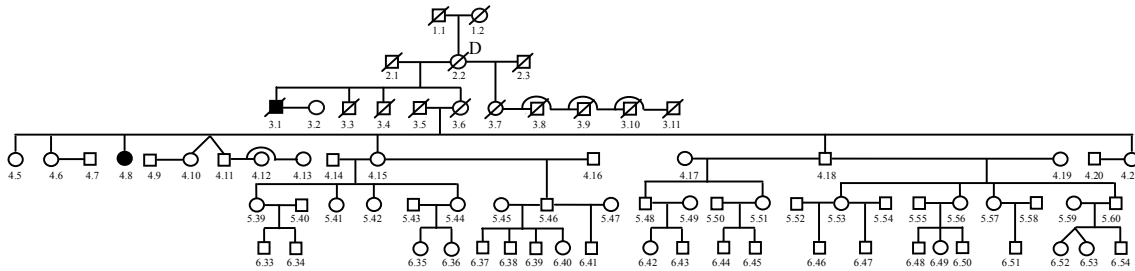

D4

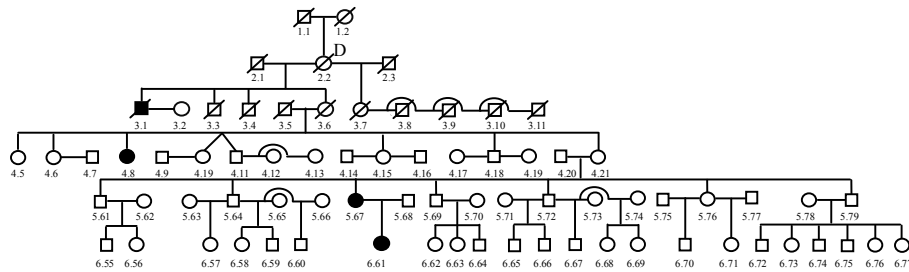

D5

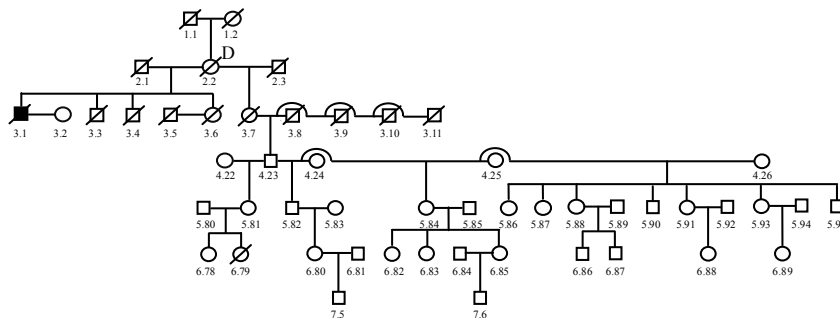

D6

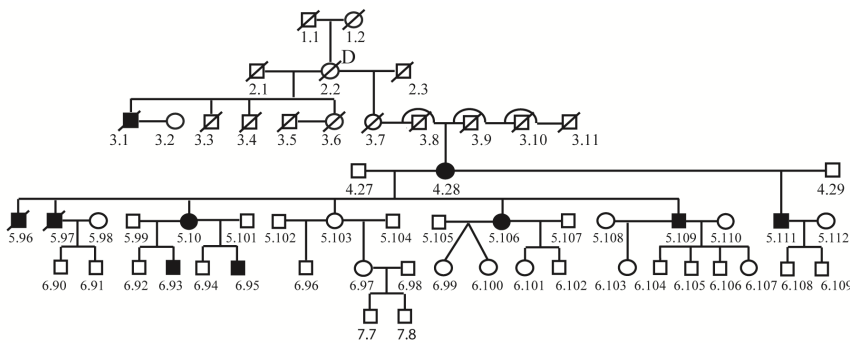

D7

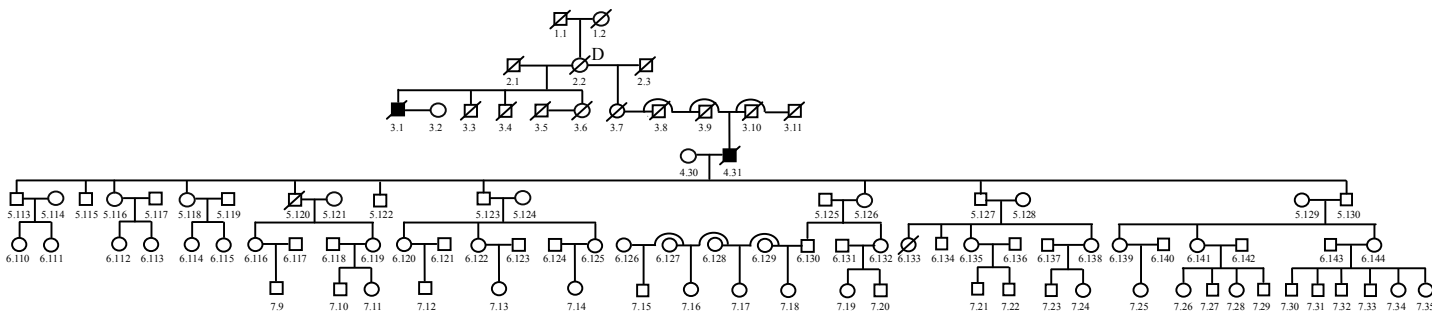

Branch

D8

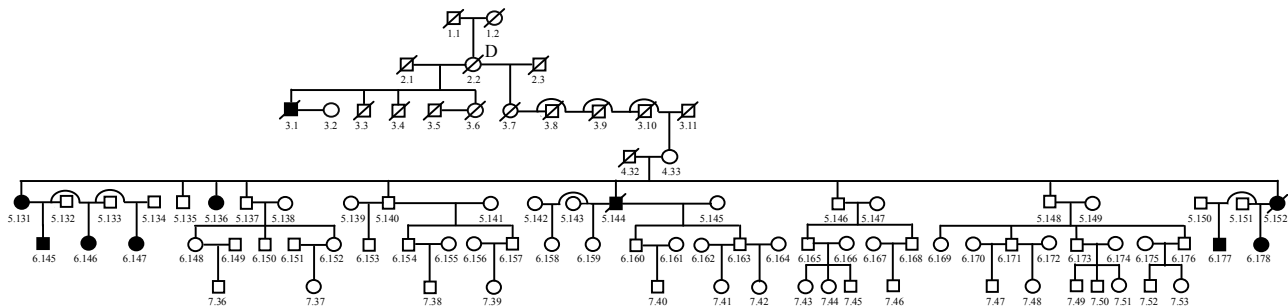

E1

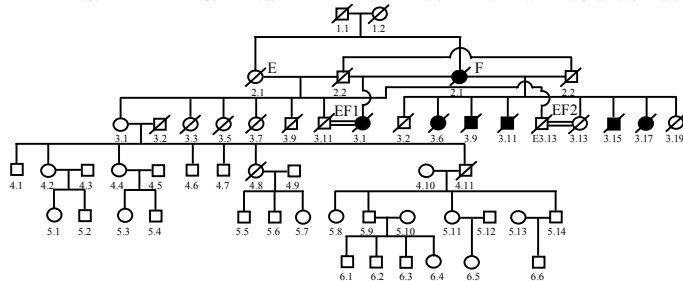

E2

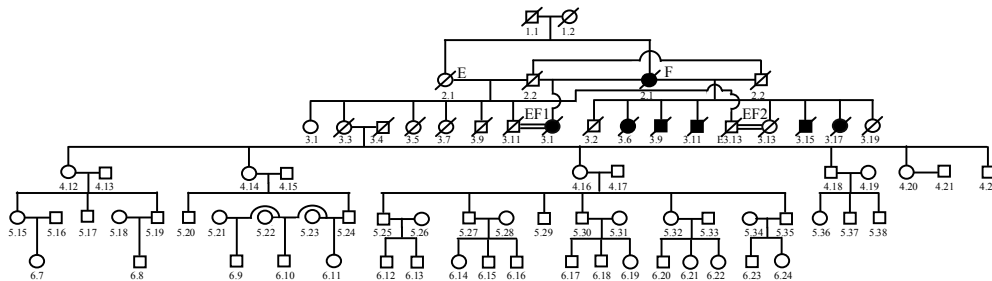

E3

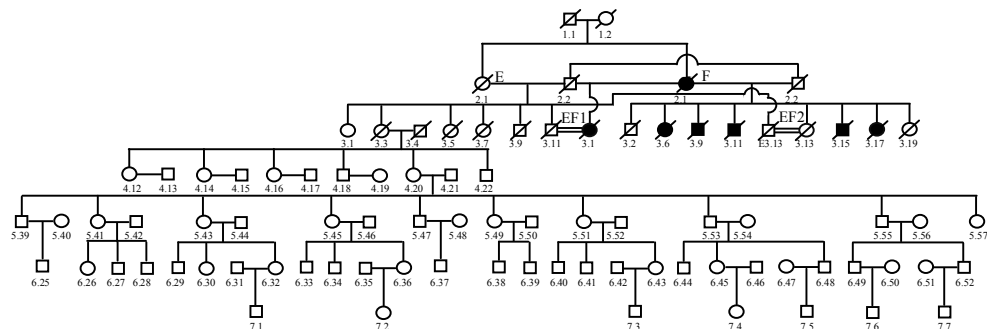

E4

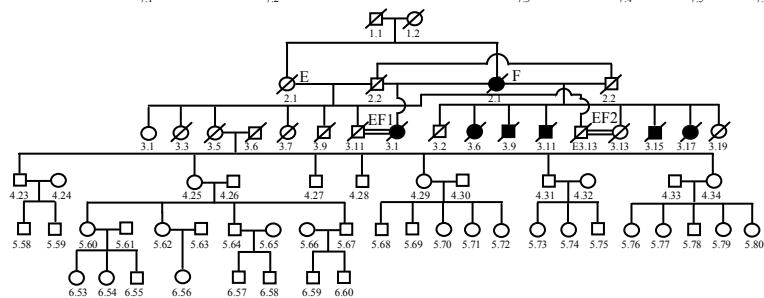

E5

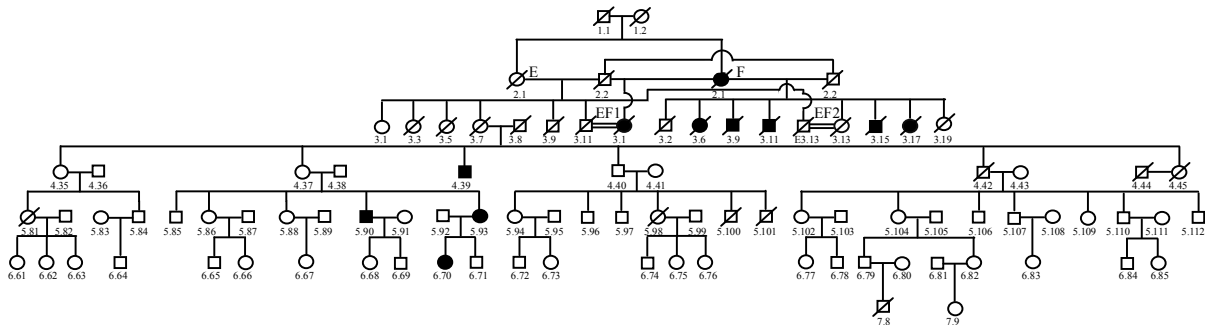

Branch

E6

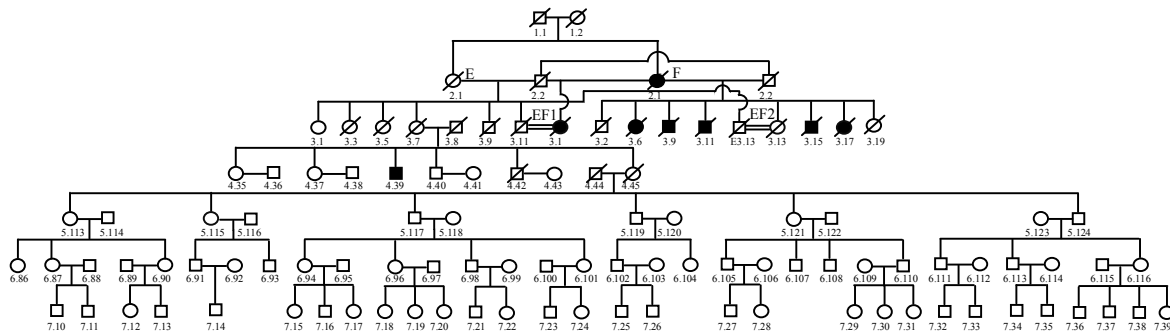

E7

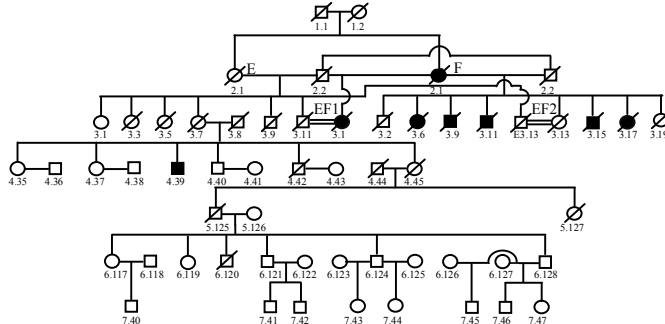

E8

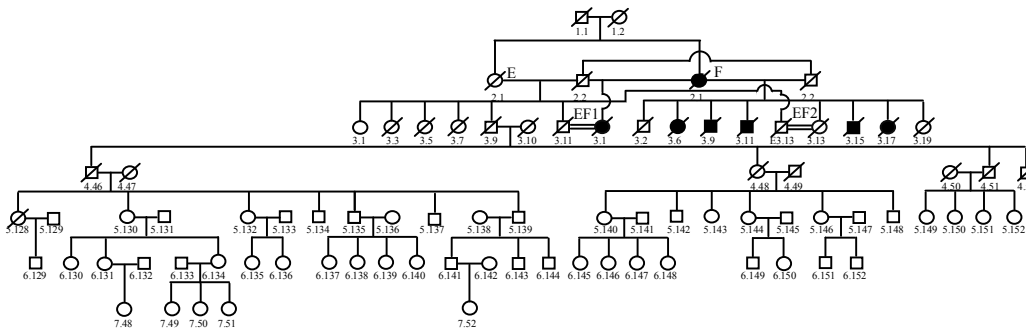

E9

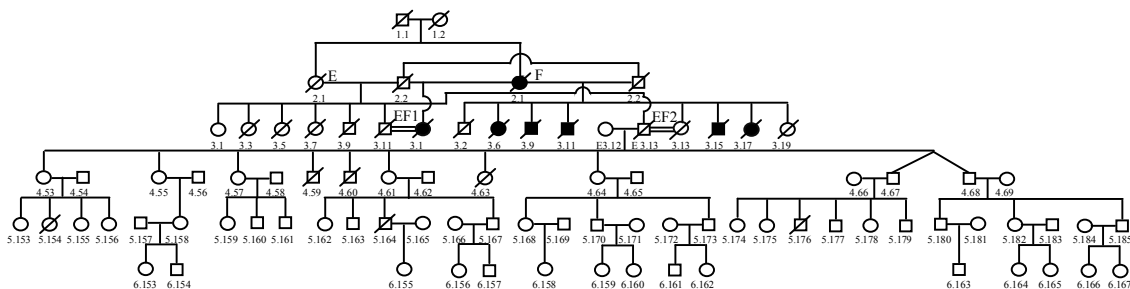

F1

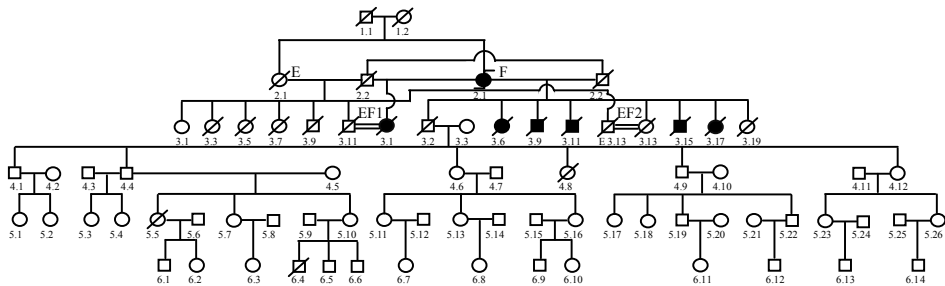

F2

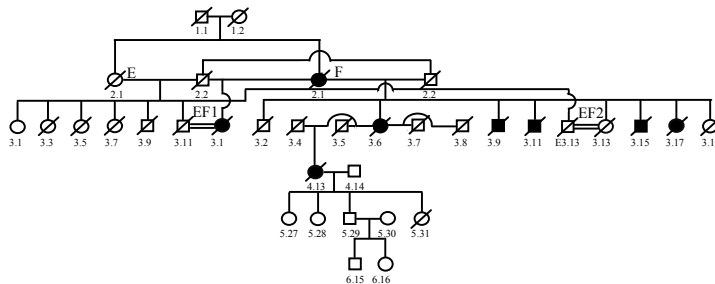

Branch

F3

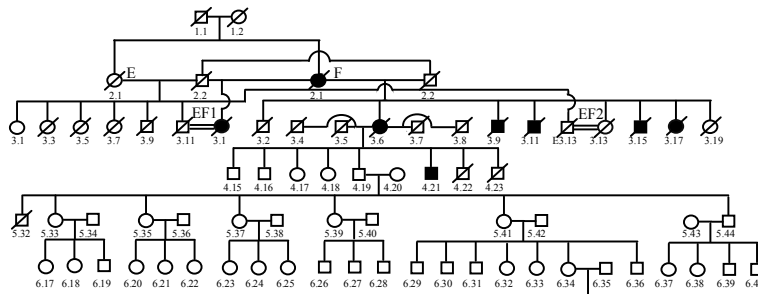

F4

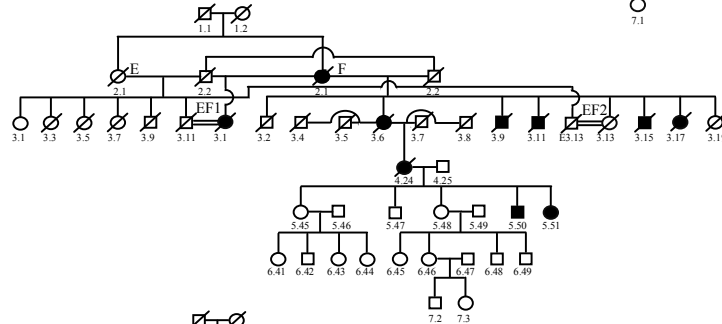

F5

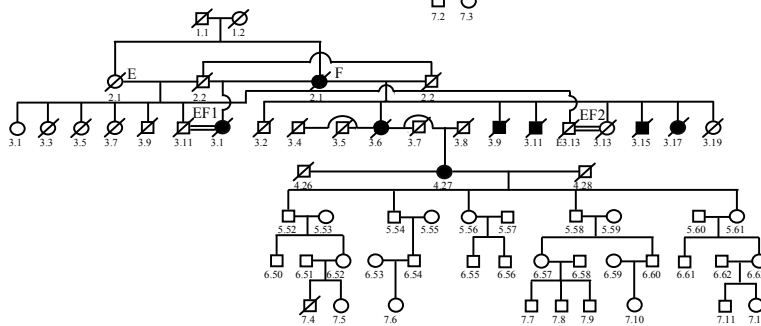

F6

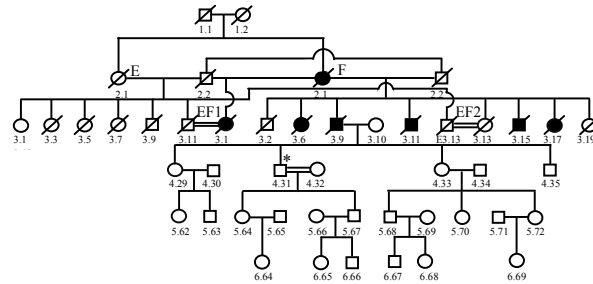

F7

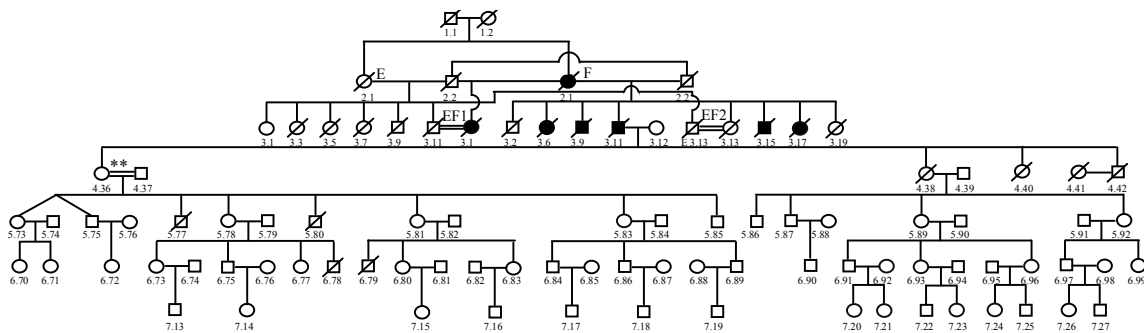

F8

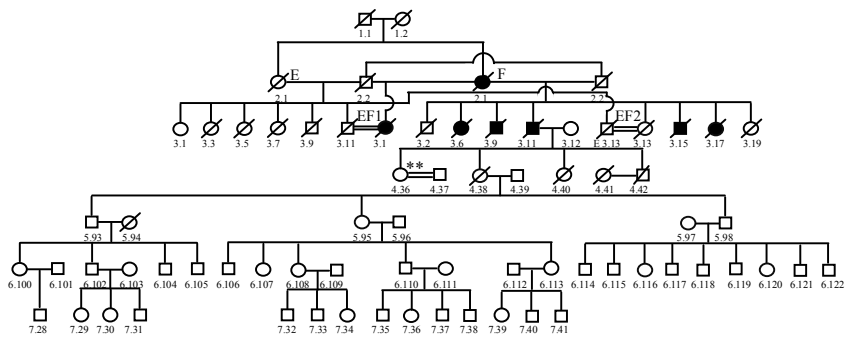

\* F4.31 = F5.210, F4.32 = F5.211

\*\* F4.36 = F4.52, F4.37 = F4.51

Branch

F9

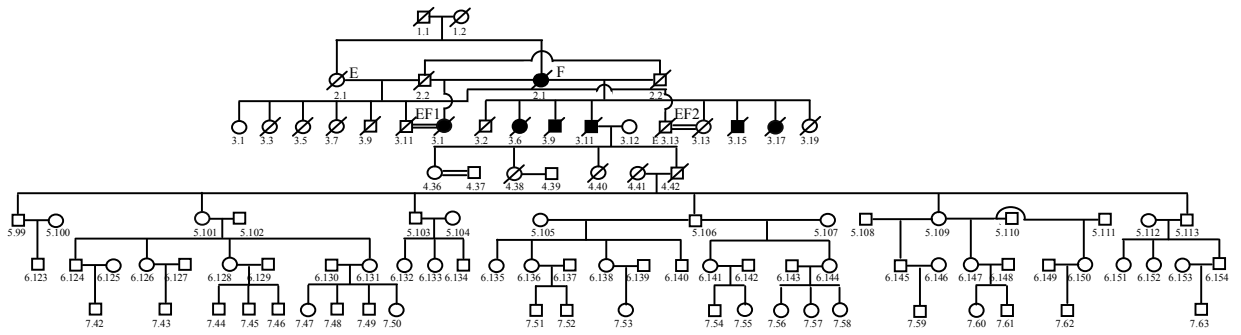

F10

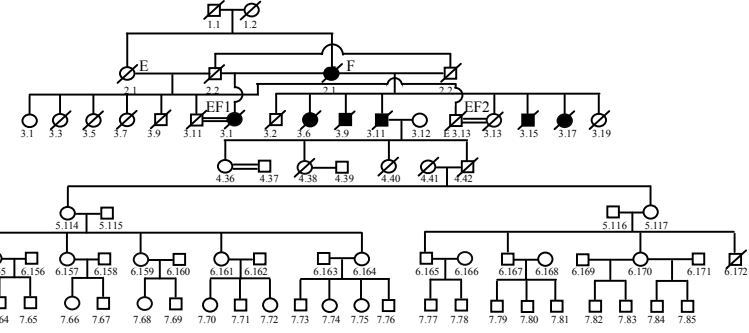

F11

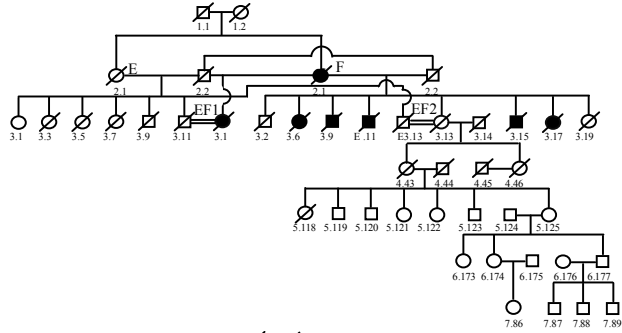

F12

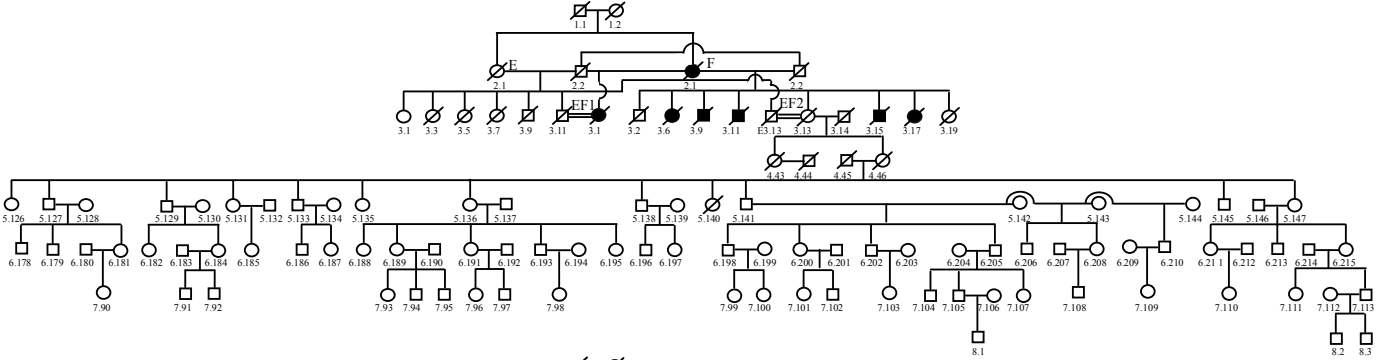

F13

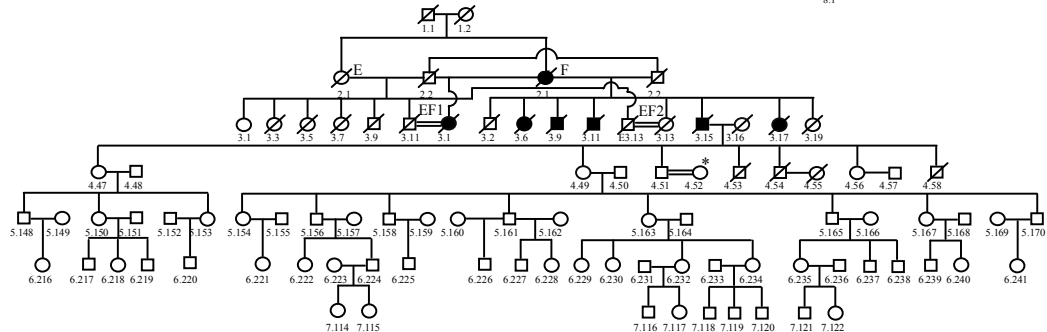

F14

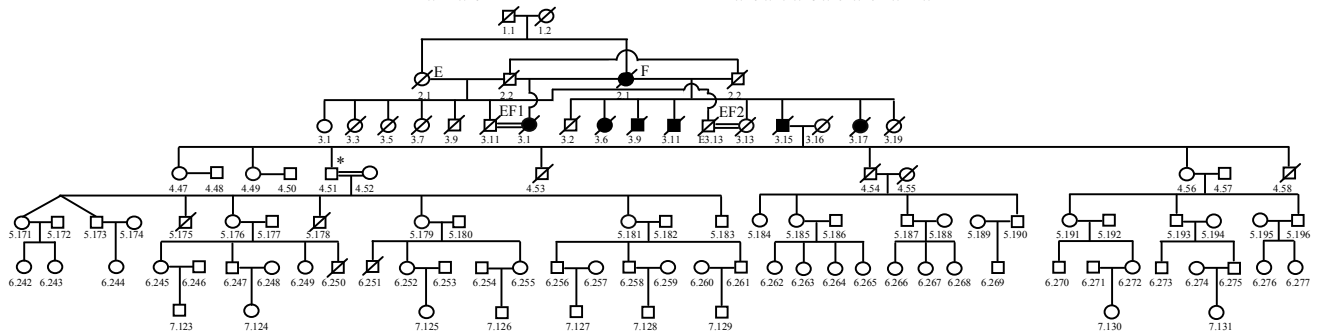





Branch

EF1.1

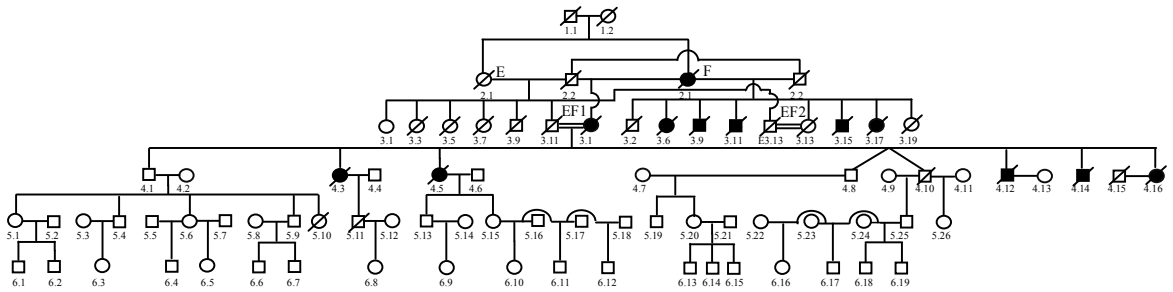

EF1.2

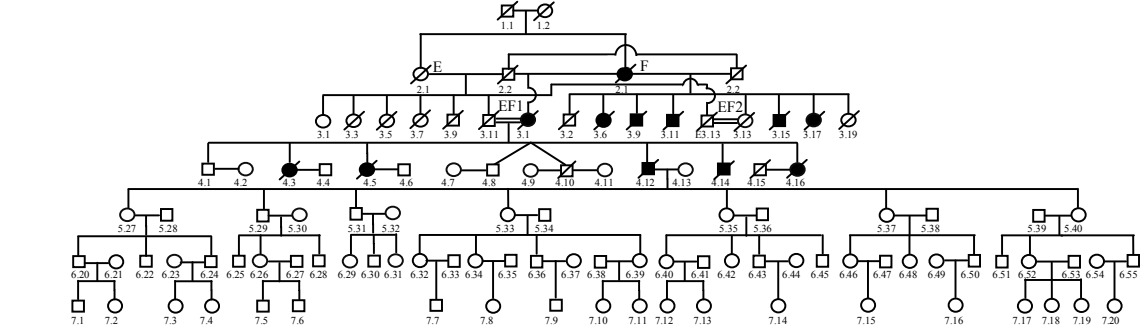

EF1.3

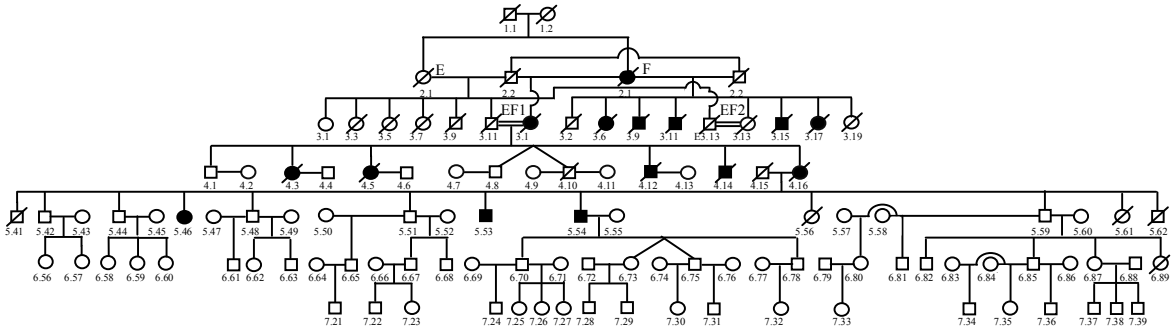

EF2

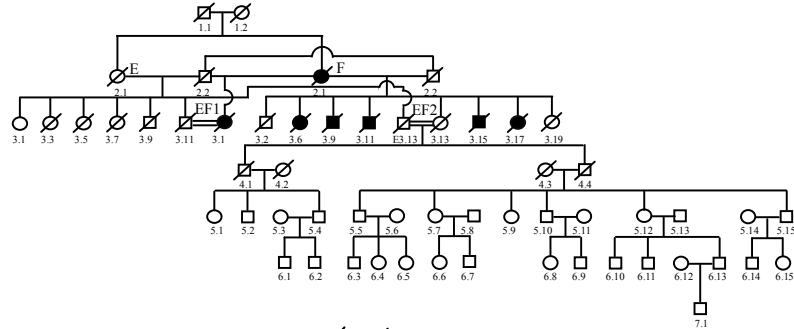

G1

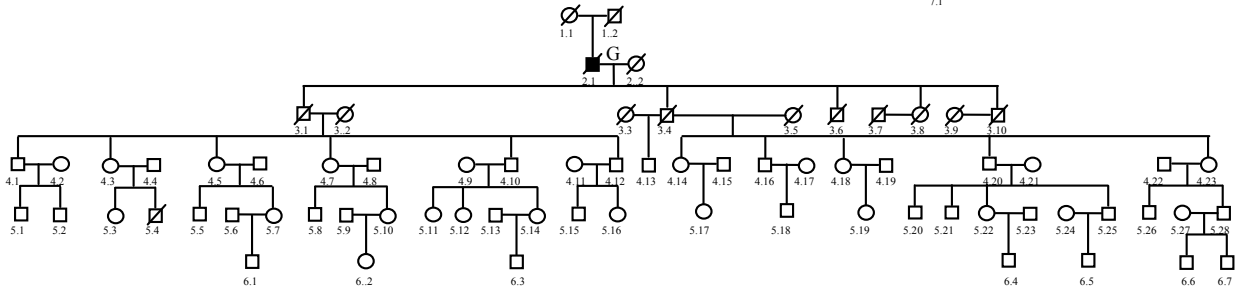

G2

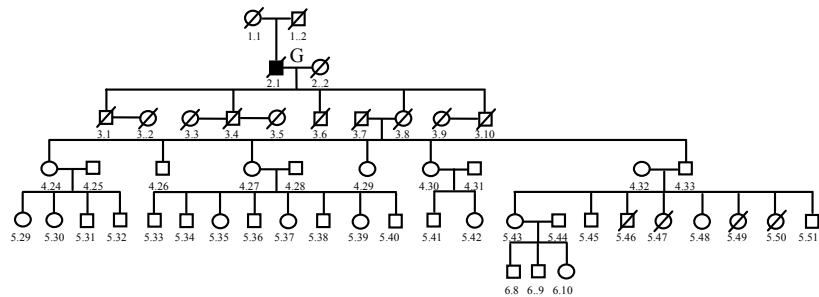

Branch

G3

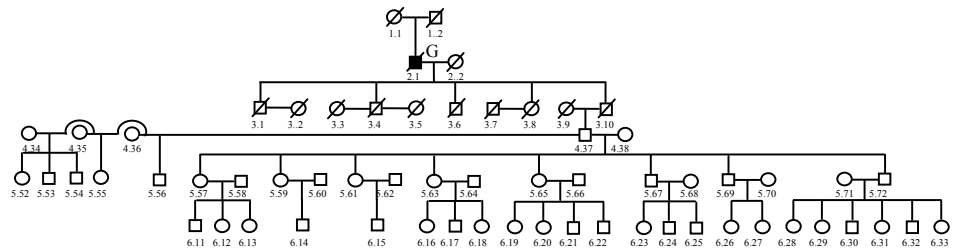

H1

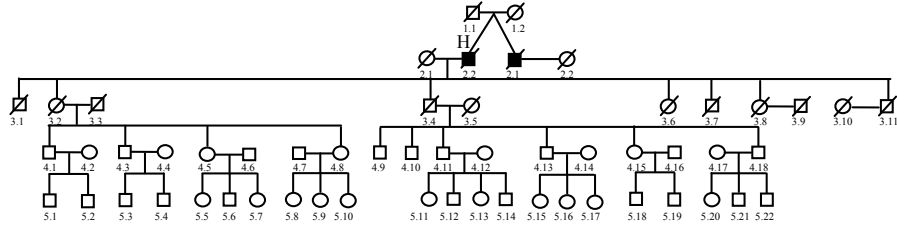

H2

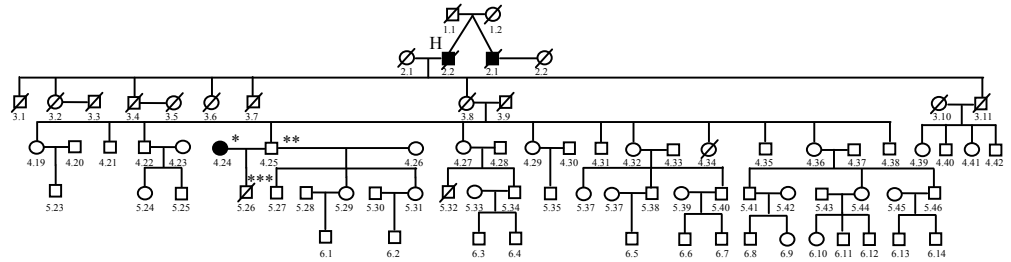

I1

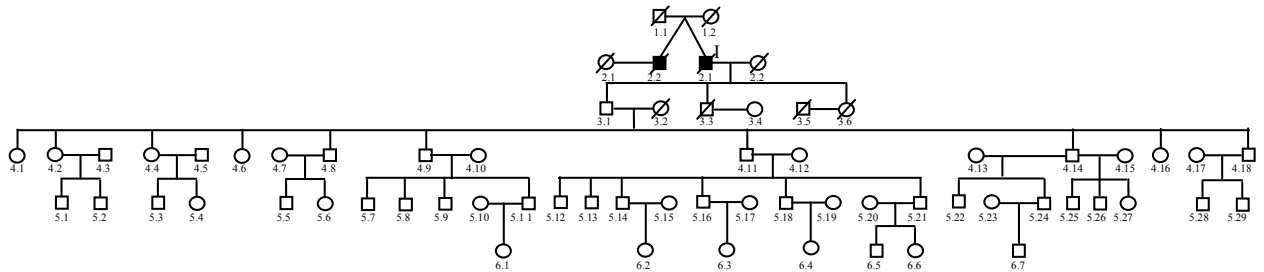

I2

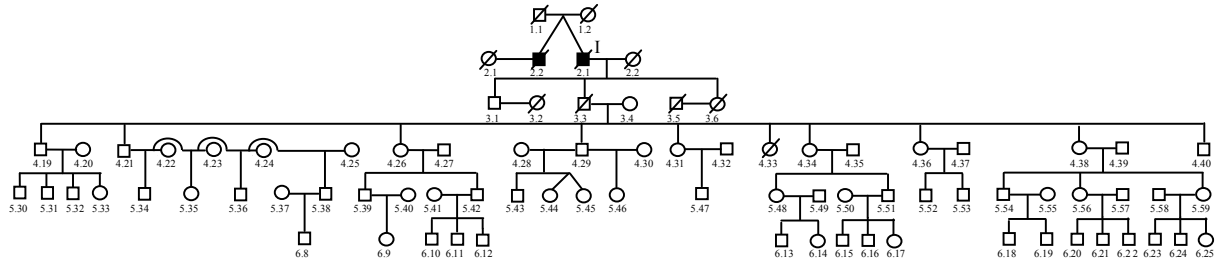

I3

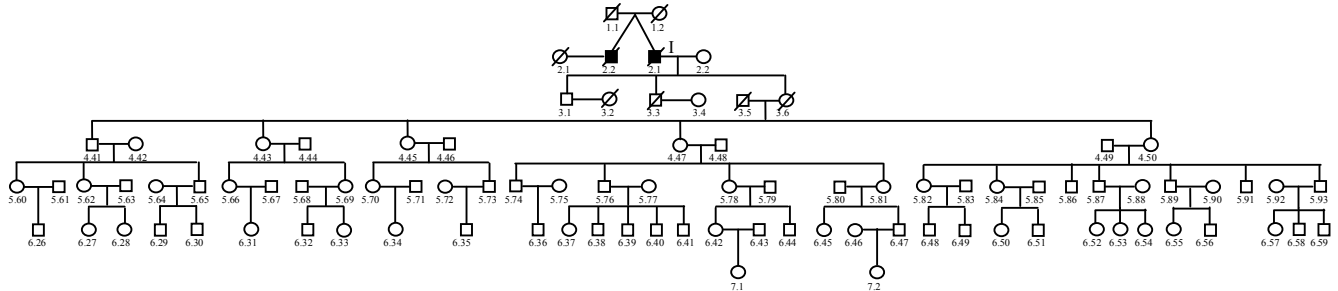

I4

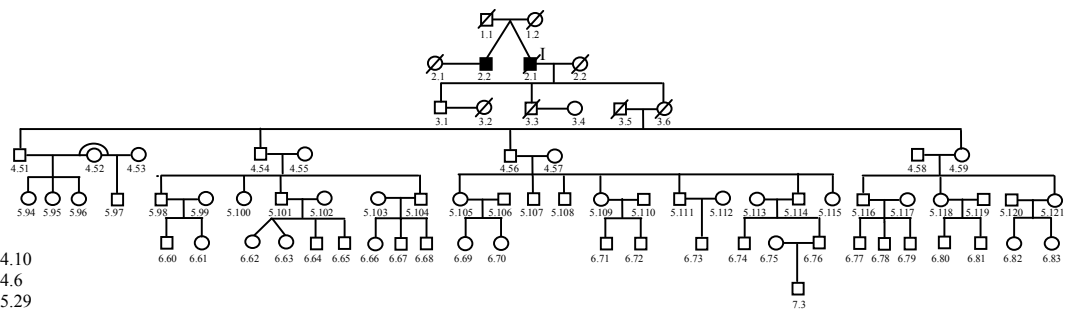

\*H4.24 = C4.10  
 \*\*H4.25 = C4.6  
 \*\*\*H5.26 = C5.29

Branch

I5

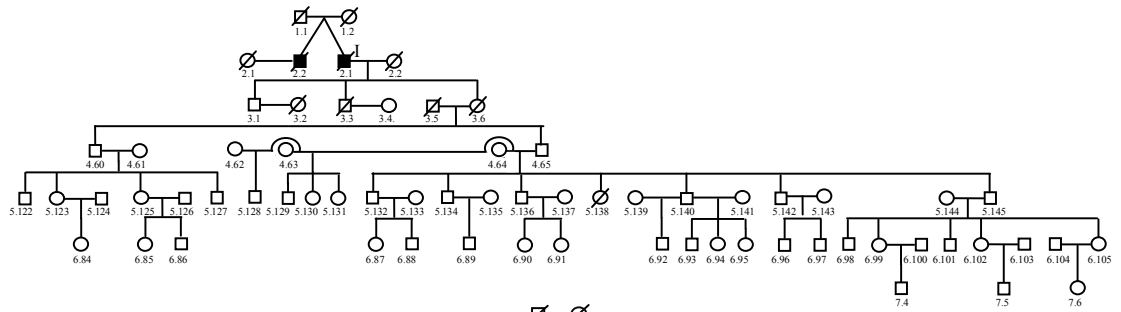

J1

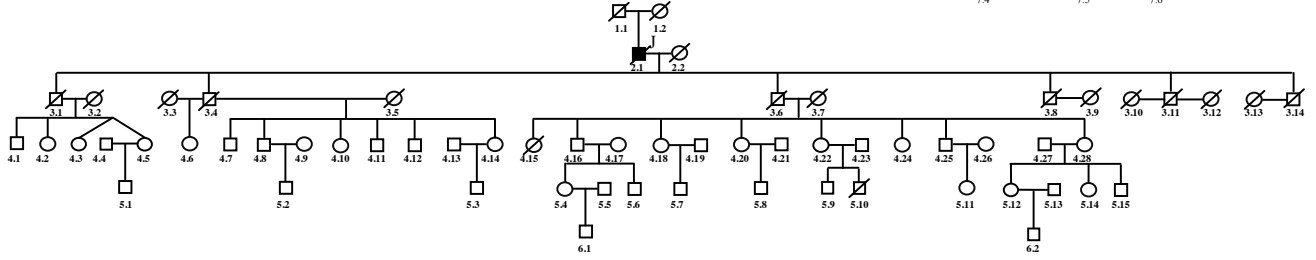

J2

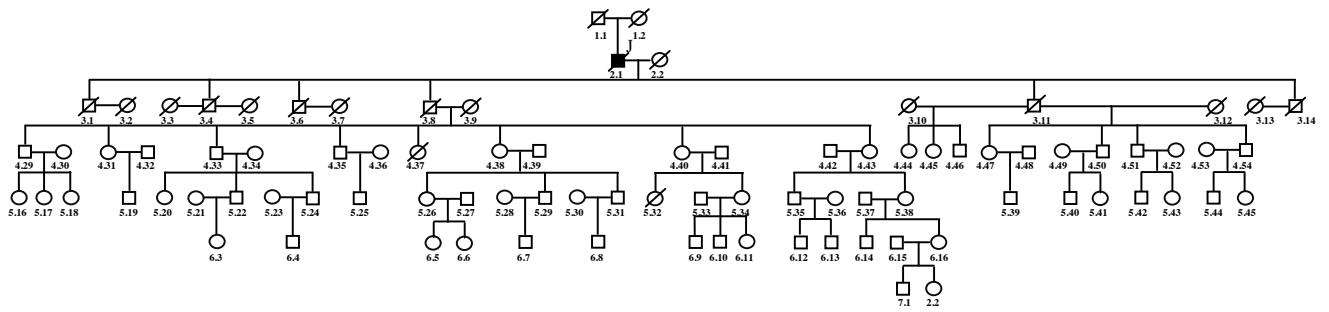

J3

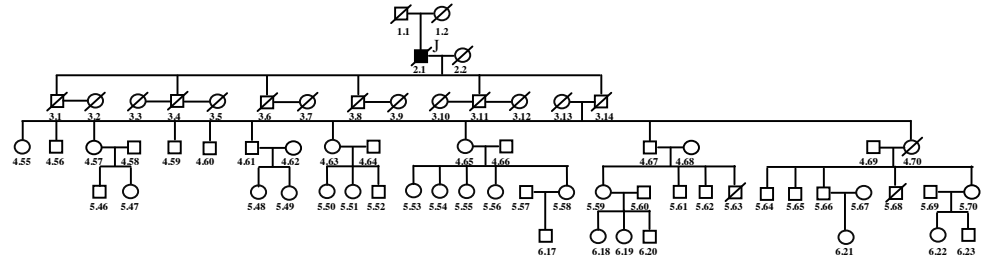

K1

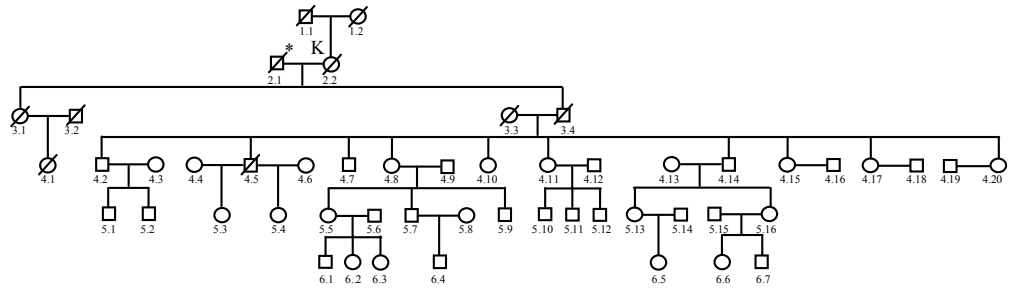

K2

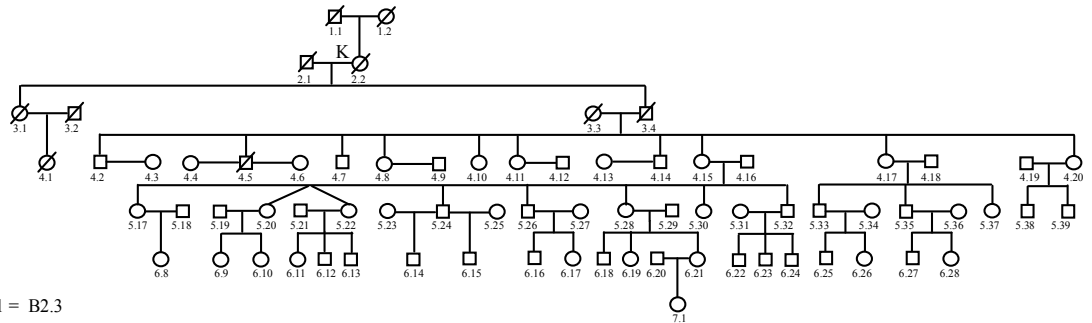

\*K2.1 = B2.3
