# Supplementary material
Source: PubMed Central journal article supplement (PMC7781299)
Supplement: NIHMS1652010-supplement-Supplementary_Table_2.pdf [file NIHMS1652010-supplement-Supplementary_Table_2.pdf]

Supplementary Table 2

## Clinical features

| Patient  | Age/Gender | Disease duration (years) | UE Muscle strength (I/D) | LE Muscle strength (P/I/D) | Reflexes (UE/Knee/Ankle) | UE Sensory involvement (T/Pa/V/Po) | LE Sensory involvement (T/Pa/V/Po) | Atrophy        | Deformities        | Mobility   |
|----------|------------|--------------------------|--------------------------|----------------------------|--------------------------|------------------------------------|------------------------------------|----------------|--------------------|------------|
| A 4.2    | 44/F       | 39                       | 5/5                      | 5/5/5                      | 2/2/2                    | 2/2/2/2                            | 2/2/2/2                            | None           | Cavus foot         | Ambulatory |
| A 5.1    | 15/M       | 12                       | 5/5                      | 5/4/5                      | 2/2/2                    | 2/2/2/2                            | 2/2/2/2                            | None           | Cavus foot + claw  | Ambulatory |
| A 5.2    | 18/F       | 16                       | 5/5                      | 5/4/5                      | 2/2/2                    | 2/2/2/2                            | 2/2/2/2                            | None           | Cavus foot         | Ambulatory |
| A 5.5    | 22/F       | 08                       | 5/5                      | 5/5/5                      | 2/2/2                    | 2/2/2/2                            | 2/2/2/2                            | Distal LE      | Cavus foot         | Ambulatory |
| B 5.88   | 37/M       | 23                       | 5/5                      | 5/4/3                      | 2/3/2                    | 2/2/2/2                            | 2/2/0/0                            | Distal LE      | Cavus foot + claw  | Ambulatory |
| B 5.93   | 40/F       | 38                       | 5/5                      | 5/4/3                      | 3/3/2                    | 2/2/2/2                            | 2/2/0/1                            | Distal LE      | Cavus foot + claw  | Ambulatory |
| B 6.28   | 19/F       | 17                       | 5/5                      | 5/4/4                      | 2/2/2                    | 2/2/2/2                            | 2/2/1/1                            | Distal LE      | Cavus foot         | Ambulatory |
| B 6.29   | 22/M       | 20                       | 5/5                      | 5/4/3                      | 3/3/0                    | 2/2/2/2                            | 2/2/2/2                            | Distal LE      | Cavus foot         | Ambulatory |
| BC 4.2   | 59/F       | 33                       | 5/4                      | 5/4/3                      | 2/1/0                    | 2/2/2/2                            | 2/2/2/2                            | Distal UE + LE | Cavus foot         | Cane       |
| BC 5.1   | 26/M       | 24                       | 5/5                      | 4/4/4                      | 3/3/2                    | 2/2/2/2                            | 2/2/2/2                            | Distal UE + LE | Cavus foot + claw  | Ambulatory |
| BC 5.5   | 30/F       | 15                       | 5/5                      | 4/4/4                      | 3/2/0                    | 2/2/2/2                            | 2/2/0/0                            | None           | Cavus foot         | Ambulatory |
| BC 5.8   | 32/M       | 31                       | 5/4                      | 4/3/3                      | 3/0/0                    | 2/2/1/1                            | 2/2/0/1                            | Distal UE + LE | Cavus foot + claw  | Wheelchair |
| C 3.6    | 80/M       | 60                       | 3/3                      | 3/1/0                      | 2/0/0                    | 2/2/1/1                            | 2/2/0/0                            | Distal UE + LE | None               | Wheelchair |
| C 5.68   | 38/F       | 28                       | 5/5                      | 5/4/4                      | 2/2/0                    | 2/2/2/2                            | 2/2/1/2                            | None           | Cavus foot         | Ambulatory |
| C 5.79   | 36/M       | 26                       | 5/5                      | 5/4/3                      | 2/1/0                    | 2/2/2/2                            | 2/2/1/2                            | Distal LE      | Cavus foot         | Ambulatory |
| C 5.87   | 44/M       | 34                       | 5/5                      | 5/4/3                      | 3/3/0                    | 2/2/2/2                            | 2/2/1/1                            | Distal LE      | Cavus foot         | Ambulatory |
| D 4.8    | 61/F       | 43                       | 4/4                      | 3/2/2                      | 3/0/0                    | 2/2/1/1                            | 2/2/0/0                            | Distal UE + LE | Cavus foot + varus | Wheelchair |
| D 4.28   | 69/F       | 51                       | 5/5                      | 4/3/1                      | 2/0/0                    | 2/2/2/2                            | 2/2/0/1                            | Distal UE + LE | Cavus foot + varus | Walker     |
| D 5.97   | 32/M       | 21                       | 5/5                      | 5/4/3                      | 2/2/0                    | 2/2/2/2                            | 2/2/1/2                            | Distal LE      | Cavus foot         | Ambulatory |
| D 5.100  | 35/F       | 20                       | 5/5                      | 5/4/4                      | 2/2/0                    | 2/2/2/2                            | 2/2/0/2                            | None           | Cavus foot + claw  | Ambulatory |
| D 5.106  | 40/F       | 05                       | 5/5                      | 5/4/4                      | 2/0/0                    | 2/2/2/2                            | 2/2/0/2                            | None           | Cavus foot + claw  | Ambulatory |
| D 5.109  | 45/M       | 38                       | 5/5                      | 3/2/1                      | 0/0/0                    | 2/2/2/2                            | 2/2/0/0                            | Distal LE      | Cavus Foot + varus | Wheelchair |
| D 5.111  | 48/M       | 34                       | 5/5                      | 4/4/3                      | 2/3/0                    | 2/2/2/2                            | 2/2/0/2                            | Distal LE      | Cavus foot + claw  | Ambulatory |
| D 5.131  | 39/F       | 13                       | 5/5                      | 4/5/5                      | 2/0/0                    | 2/2/2/2                            | 2/2/1/0                            | Distal LE      | Cavus foot         | Ambulatory |
| D 5.136  | 43/F       | 18                       | 5/5                      | 4/4/4                      | 2/1/0                    | 2/2/2/2                            | 2/2/1/1                            | None           | Cavus foot         | Ambulatory |
| D 6.61   | 09/F       | 07                       | 5/5                      | 5/5/5                      | 2/3/2                    | 2/2/2/2                            | 2/2/2/2                            | None           | None               | Ambulatory |
| D 6.146  | 16/F       | 02                       | 5/5                      | 5/5/4                      | 2/2/2                    | 2/2/2/2                            | 2/2/2/2                            | Distal LE      | Cavus foot         | Ambulatory |
| D 6.147  | 20/F       | 19                       | 5/5                      | 5/4/3                      | 2/3/2                    | 2/2/2/2                            | 2/2/2/0                            | Distal LE      | None               | Ambulatory |
| D 6.177  | 36/M       | 34                       | 5/5                      | 5/5/5                      | 2/2/2                    | 2/2/2/2                            | 2/2/0/1                            | None           | Cavus foot         | Ambulatory |
| D 6.178  | 38/F       | 36                       | 5/5                      | 4/3/2                      | 2/4/4                    | 2/2/2/2                            | 2/2/0/1                            | Distal UE + LE | Cavus foot         | Walker     |
| E 4.39   | 75/M       | 20                       | 5/5                      | 5/4/4                      | 1/2/1                    | 2/2/2/2                            | 2/2/2/2                            | Distal LE      | None               | Cane       |
| E 5.93   | 47/F       | 05                       | 5/5                      | 5/5/4                      | 2/2/1                    | 2/2/2/2                            | 2/2/1/1                            | None           | Cavus foot         | Ambulatory |
| E 6.70   | 9/F        | 05                       | 5/5                      | 5/5/4                      | 2/2/1                    | 2/2/2/2                            | 2/2/1/1                            | Distal LE      | Cavus foot         | Ambulatory |
| EF1 4.3  | 52 F       | 50                       | 5/5                      | 5/3/2                      | 0/0/0                    | 2/2/1/1                            | 2/2/1/1                            | Distal UE + LE | Cavus foot + varus | Cane       |
| EF1 4.5  | 57/F       | 47                       | 5/5                      | 4/3/3                      | 3/3/0                    | 2/2/2/2                            | 2/2/2/2                            | Distal LE      | Cavus foot + varus | Cane       |
| EF1 4.12 | 70/M       | 30                       | 5/5                      | 5/4/3                      | 2/1/0                    | 2/2/2/2                            | 2/2/0/0                            | Distal LE      | None               | Cane       |
| EF1 4.14 | 72/M       | 44                       | 4/4                      | 3/2/1                      | 0/0/0                    | 2/2/1/1                            | 2/2/1/1                            | Distal UE + LE | Cavus foot         | Wheelchair |
| EF1 5.46 | 46/F       | 39                       | 5/5                      | 5/4/4                      | 2/2/2                    | 2/2/2/2                            | 2/2/0/0                            | Distal LE      | Cavus foot         | Ambulatory |
| EF1 5.53 | 51/M       | 40                       | 5/5                      | 5/5/5                      | 2/2/0                    | 2/2/2/2                            | 2/2/2/2                            | None           | None               | Ambulatory |
| F 5.243  | 70/F       | 02                       | 5/5                      | 5/5/5                      | 2/2/2                    | 2/2/2/2                            | 2/2/2/1                            | None           | Cavus foot         | Ambulatory |
| F 6.357  | 30/M       | 22                       | 5/5                      | 5/4/4                      | 3/4/4                    | 2/2/2/2                            | 2/2/2/1                            | Distal LE      | None               | Ambulatory |
| F 6.363  | 35/M       | 18                       | 5/4                      | 5/4/4                      | 2/2/1                    | 2/2/2/2                            | 2/2/1/1                            | None           | Cavus foot         | Ambulatory |
| F 6.370  | 49/F       | 10                       | 5/5                      | 5/5/5                      | 2/3/1                    | 2/2/2/2                            | 2/2/2/2                            | None           | Cavus foot         | Ambulatory |
| F 6.372  | 52/M       | 37                       | 5/4                      | 5/4/3                      | 3/4/4                    | 2/2/2/2                            | 2/2/1/1                            | Distal UE + LE | Cavus foot         | Cane       |

UE, upper extremity; LE, lower extremity; P, proximal (knee extensor or flexor); I, intermediate (hand extensor or flexor (UE); foot extensor or flexor (LE)); D, distal (intrinsic hand muscles (UE), intrinsic foot muscles (LE)). Motor scale: 5, normal; 4, mild weakness; 3, ability to lift against gravity; 2, not able to lift against gravity, but movement visible; 1, no movement but tendon contraction visible; 0, complete paralysis. Reflexes: 4, clonus; 3 increased; 2, normal; 1, reduced; 0, absent; Sensory involvement/sense of vibration or position: T, touch; Pa, pain; V, vibration; Po, position; 2, normal; 1, mildly reduced; distally to wrist level (UE) or malleoli level (LE), 0, severely reduced; distally to elbow level (UE) or knee level (LE). Deformities: claw, claw toes.
