# Supplementary material
Source: PubMed Central journal article supplement (PMC7781299)
Supplement: NIHMS1652010-supplement-Supplementary_Table_3.pdf [file NIHMS1652010-supplement-Supplementary_Table_3.pdf]

Supplementary Table 3  
Electrophysiological data

| Patient | Nerve    | Motor NCS |                     |           |                    |                  |                    | Sensory NCS |                    |                 |                   |
|---------|----------|-----------|---------------------|-----------|--------------------|------------------|--------------------|-------------|--------------------|-----------------|-------------------|
|         |          | DML(ms)   |                     | MNCV(m/s) |                    | Distal CMAP (mV) |                    | SNCV (m/s)  |                    | SNAP ( $\mu$ V) |                   |
|         |          | Right     | Left                | Right     | Left               | Right            | Left               | Right       | Left               | Right           | Left              |
| B 5.88  | Median   | 5.6       | 5.0 ( $\leq 4.4$ )  | 41.0      | 47.0 ( $\geq 49$ ) | 2.1              | 1.6 ( $\geq 4.0$ ) | NR          | NR                 | NR              | NR                |
|         | Ulnar    | 3.6       | 3.8 ( $\leq 3.3$ )  | 42.0      | 44.0 ( $\geq 49$ ) | 4.3              | 4.3 ( $\geq 6.0$ ) | NR          | NR                 | NR              | NR                |
|         | Tibial   | 5.8       | 6.2 ( $\leq 5.8$ )  | 34.0      | 27.0 ( $\geq 41$ ) | 0.4              | 1.0 ( $\geq 4.0$ ) |             |                    |                 |                   |
|         | Peroneal | 5.5       | 7.3 ( $\leq 6.5$ )  | 27.0      | 40.0 ( $\geq 44$ ) | 1.4              | 1.3 ( $\geq 2.0$ ) |             |                    |                 |                   |
|         | Sural    |           |                     |           |                    |                  |                    | NR          | NR                 | NR              | NR                |
| B 5.93  | Median   | 5.2       | 4.8 ( $\leq 4.4$ )  | 50.0      | 51.0 ( $\geq 49$ ) | 4.8              | 4.7 ( $\geq 4.0$ ) | NR          | NR                 | NR              | NR                |
|         | Ulnar    | 3.4       | 3.7 ( $\leq 3.3$ )  | 50.0      | 50.0 ( $\geq 49$ ) | 4.4              | 7.3 ( $\geq 6.0$ ) | NR          | NR                 | NR              | NR                |
|         | Tibial   | 4.6       | 5.6 ( $\leq 5.8$ )  | 38.0      | 41.0 ( $\geq 41$ ) | 0.6              | 0.4 ( $\geq 4.0$ ) |             |                    |                 |                   |
|         | Peroneal | 4.6       | 4.8 ( $\leq 6.5$ )  | 35.0      | 40.0 ( $\geq 44$ ) | 1.8              | 0.4 ( $\geq 2.0$ ) |             |                    |                 |                   |
|         | Sural    |           |                     |           |                    |                  |                    | NR          | NR                 | NR              | NR                |
| B 6.28  | Median   | 3.9       | 3.7 ( $\leq 4.4$ )  | 54.4      | 52.6 ( $\geq 49$ ) | 4.9              | 4.2 ( $\geq 4.0$ ) | NR          | NR                 | NR              | NR                |
|         | Ulnar    | 3.4       | 3.9 ( $\leq 3.3$ )  | 59.9      | 67.4 ( $\geq 49$ ) | 9.6              | 7.6 ( $\geq 6.0$ ) | NR          | NR                 | NR              | NR                |
|         | Tibial   | 6.4       | 5.7 ( $\leq 5.8$ )  | 46.9      | 44.4 ( $\geq 41$ ) | 1.3              | 1.4 ( $\geq 4.0$ ) |             |                    |                 |                   |
|         | Peroneal | 5.2       | 5.2 ( $\leq 6.5$ )  | 47.4      | 55.9 ( $\geq 44$ ) | 1.8              | 2.5 ( $\geq 2.0$ ) |             |                    |                 |                   |
|         | Sural    |           |                     |           |                    |                  |                    | NR          | NR                 | NR              | NR                |
| BC 5.1  | Median   | 4.1       | 4.1 ( $\leq 4.4$ )  | 56.0      | 53.0 ( $\geq 49$ ) | 3.8              | 3.7 ( $\geq 4.0$ ) | 48.0        | 44.0 ( $\geq 50$ ) | 2.8             | 2.3 ( $\geq 20$ ) |
|         | Ulnar    | 2.7       | 2.6 ( $\leq 3.3$ )  | 57.0      | 58.0 ( $\geq 49$ ) | 7.4              | 9.3 ( $\geq 6.0$ ) | 47.0        | 47.0 ( $\geq 50$ ) | 2.9             | 3.6 ( $\geq 17$ ) |
|         | Tibial   | 4.5       | 6.6 ( $\leq 5.8$ )  | 28.0      | 38.0 ( $\geq 41$ ) | 0.4              | 1.0 ( $\geq 4.0$ ) |             |                    |                 |                   |
|         | Peroneal | 3.7       | 4.2 ( $\leq 6.5$ )  | 48.0      | 54.0 ( $\geq 44$ ) | 0.5              | 1.8 ( $\geq 2.0$ ) |             |                    |                 |                   |
|         | Sural    |           |                     |           |                    |                  |                    | 38.0        | 35.0 ( $\geq 40$ ) | 3.0             | 7.0 ( $\geq 5$ )  |
| BC 5.5  | Median   | 4.8       | 4.2 ( $\leq 4.4$ )  | 49.0      | 48.0 ( $\geq 49$ ) | 1.6              | 1.5 ( $\geq 4.0$ ) | NR          | NR                 | NR              | NR                |
|         | Ulnar    | 3.0       | 3.0 ( $\leq 3.3$ )  | 45.0      | 45.0 ( $\geq 49$ ) | 4.8              | 5.6 ( $\geq 6.0$ ) | 37.0        | 39.0 ( $\geq 50$ ) | 1.9             | 3.9 ( $\geq 17$ ) |
|         | Tibial   | 9.1       | 9.2 ( $\leq 5.8$ )  | 20.0      | 30.0 ( $\geq 41$ ) | 1.0              | 1.0 ( $\geq 4.0$ ) |             |                    |                 |                   |
|         | Peroneal | 5.5       | 6.0 ( $\leq 6.5$ )  | 40.0      | 31.0 ( $\geq 44$ ) | 0.6              | 1.6 ( $\geq 2.0$ ) |             |                    |                 |                   |
|         | Sural    |           |                     |           |                    |                  |                    | NR          | NR                 | NR              | NR                |
| C 5.68  | Median   | 3.9       | 3.9 ( $\leq 4.4$ )  | 50.0      | 50.0 ( $\geq 49$ ) | 5.2              | 5.5 ( $\geq 4.0$ ) | NR          | NR                 | NR              | NR                |
|         | Ulnar    | 3.5       | 3.3 ( $\leq 3.3$ )  | 55.0      | 54.0 ( $\geq 49$ ) | 6.4              | 7.0 ( $\geq 6.0$ ) | NR          | NR                 | NR              | NR                |
|         | Tibial   | 7.2       | 7.2 ( $\leq 5.8$ )  | 28.0      | 32.0 ( $\geq 41$ ) | 1.0              | 1.0 ( $\geq 4.0$ ) |             |                    |                 |                   |
|         | Peroneal | 5.8       | 7.6 ( $\leq 6.5$ )  | 36.0      | 36.0 ( $\geq 44$ ) | 1.4              | 1.1 ( $\geq 2.0$ ) |             |                    |                 |                   |
|         | Sural    |           |                     |           |                    |                  |                    | NR          | NR                 | NR              | NR                |
| C 5.87  | Median   | 4.1       | 4.3 ( $\leq 4.4$ )  | 53.0      | 51.0 ( $\geq 49$ ) | 6.0              | 4.0 ( $\geq 4.0$ ) | NR          | NR                 | NR              | NR                |
|         | Ulnar    | 2.7       | 2.7 ( $\leq 3.3$ )  | 59.0      | 61.0 ( $\geq 49$ ) | 6.7              | 6.8 ( $\geq 6.0$ ) | NR          | NR                 | NR              | NR                |
|         | Tibial   | 4.2       | 4.1 ( $\leq 5.8$ )  | 47.0      | 36.0 ( $\geq 41$ ) | 2.0              | 2.8 ( $\geq 4.0$ ) |             |                    |                 |                   |
|         | Peroneal | 4.7       | 4.4 ( $\leq 6.5$ )  | 50.0      | 48.0 ( $\geq 44$ ) | 5.0              | 2.1 ( $\geq 2.0$ ) |             |                    |                 |                   |
|         | Sural    |           |                     |           |                    |                  |                    | NR          | NR                 | NR              | NR                |
| D 5.67  | Median   | 4.2       | 4.4 ( $\leq 4.4$ )  | 50.0      | 49.0 ( $\geq 49$ ) | 7.0              | 7.5 ( $\geq 4.0$ ) | 26.4        | 30.4 ( $\geq 50$ ) | 5.0             | 4.3 ( $\geq 20$ ) |
|         | Ulnar    | 2.3       | 2.9 ( $\leq 3.3$ )  | 60.0      | 59.0 ( $\geq 49$ ) | 7.2              | 7.0 ( $\geq 6.0$ ) | 40.0        | 40.0 ( $\geq 50$ ) | 5.3             | 3.6 ( $\geq 17$ ) |
|         | Tibial   | 5.2       | 4.6 ( $\leq 5.8$ )  | 50.0      | 46.0 ( $\geq 41$ ) | 4.2              | 5.0 ( $\geq 4.0$ ) |             |                    |                 |                   |
|         | Peroneal | 3.7       | 3.9 ( $\leq 6.5$ )  | 48.0      | 48.0 ( $\geq 44$ ) | 3.7              | 4.0 ( $\geq 2.0$ ) |             |                    |                 |                   |
|         | Sural    |           |                     |           |                    |                  |                    | NR          | NR                 | NR              | NR                |
| D 5.97  | Median   | 4.5       | 5.0 ( $\leq 4.4$ )  | 45.0      | 45.0 ( $\geq 49$ ) | 4.5              | 5.3 ( $\geq 4.0$ ) | NR          | NR                 | NR              | NR                |
|         | Ulnar    | 3.5       | 4.5 ( $\leq 3.3$ )  | 40.0      | 44.0 ( $\geq 49$ ) | 5.5              | 5.4 ( $\geq 6.0$ ) | NR          | NR                 | NR              | NR                |
|         | Tibial   | 5.2       | 9.6 ( $\leq 5.8$ )  | 33.0      | 29.0 ( $\geq 41$ ) | 1.3              | 0.6 ( $\geq 4.0$ ) |             |                    |                 |                   |
|         | Peroneal | 5.2       | 5.6 ( $\leq 6.5$ )  | 42.0      | 40.0 ( $\geq 44$ ) | 1.5              | 0.2 ( $\geq 2.0$ ) |             |                    |                 |                   |
|         | Sural    |           |                     |           |                    |                  |                    | NR          | NR                 | NR              | NR                |
| D 5.111 | Median   | 5.1       | 4.7 ( $\leq 4.4$ )  | 44.5      | 53.4 ( $\geq 49$ ) | 7.4              | 5.8 ( $\geq 4.0$ ) | NR          | NR                 | NR              | NR                |
|         | Ulnar    | 3.0       | 3.7 ( $\leq 3.3$ )  | 67.4      | 58.1 ( $\geq 49$ ) | 8.2              | 7.7 ( $\geq 6.0$ ) | NR          | NR                 | NR              | NR                |
|         | Tibial   | 4.2       | 5.7 ( $\leq 5.8$ )  | 33.5      | 41.5 ( $\geq 41$ ) | 2.5              | 3.7 ( $\geq 4.0$ ) |             |                    |                 |                   |
|         | Peroneal | 6.0       | 4.2 ( $\leq 6.5$ )  | 37.4      | 45.0 ( $\geq 44$ ) | 6.5              | 3.2 ( $\geq 2.0$ ) |             |                    |                 |                   |
|         | Sural    |           |                     |           |                    |                  |                    | NR          | NR                 | NR              | NR                |
| D 5.131 | Median   | 3.8       | 3.8 ( $\leq 4.4$ )  | 60.0      | 55.0 ( $\geq 49$ ) | 5.6              | 5.2 ( $\geq 4.0$ ) | NR          | NR                 | NR              | NR                |
|         | Ulnar    | 2.7       | 2.7 ( $\leq 3.3$ )  | 60.0      | 59.0 ( $\geq 49$ ) | 5.9              | 6.9 ( $\geq 6.0$ ) | NR          | NR                 | NR              | NR                |
|         | Tibial   | 6.3       | 6.1 ( $\leq 5.8$ )  | 41.0      | 42.0 ( $\geq 41$ ) | 0.4              | 1.1 ( $\geq 4.0$ ) |             |                    |                 |                   |
|         | Peroneal | 5.4       | 5.7 ( $\leq 6.5$ )  | 27.0      | 37.0 ( $\geq 44$ ) | 1.6              | 1.0 ( $\geq 2.0$ ) |             |                    |                 |                   |
|         | Sural    |           |                     |           |                    |                  |                    | NR          | NR                 | NR              | NR                |
| D 5.136 | Median   | 5.1       | 4.7 ( $\leq 4.4$ )  | 42.6      | 48.8 ( $\geq 49$ ) | 2.5              | 4.5 ( $\geq 4.0$ ) | NR          | NR                 | NR              | NR                |
|         | Ulnar    | 3.9       | 3.7 ( $\leq 3.3$ )  | 67.4      | 59.9 ( $\geq 49$ ) | 6.5              | 4.9 ( $\geq 6.0$ ) | NR          | NR                 | NR              | NR                |
|         | Tibial   | 8.1       | 12.3 ( $\leq 5.8$ ) | 30.4      | 31.6 ( $\geq 41$ ) | 0.3              | 0.3 ( $\geq 4.0$ ) |             |                    |                 |                   |
|         | Peroneal | 6.1       | 6.9 ( $\leq 6.5$ )  | 29.1      | 30.0 ( $\geq 44$ ) | 0.1              | 1.0 ( $\geq 2.0$ ) |             |                    |                 |                   |
|         | Sural    |           |                     |           |                    |                  |                    | NR          | NR                 | NR              | NR                |

Normal adult values in parenthesis [1]; NR, not recordable.

Supplementary Table 3  
Electrophysiological data (continued)

| Patient  | Nerve    | Motor NCS |                    |           |                    |                  |                    | Sensory NCS |                    |                 |                    |
|----------|----------|-----------|--------------------|-----------|--------------------|------------------|--------------------|-------------|--------------------|-----------------|--------------------|
|          |          | DML(ms)   |                    | MNCV(m/s) |                    | Distal CMAP (mV) |                    | SNCV (m/s)  |                    | SNAP ( $\mu$ V) |                    |
|          |          | Right     | Left               | Right     | Left               | Right            | Left               | Right       | Left               | Right           | Left               |
| D 6.61   | Median   | 4.8       | 4.3 ( $\leq 4.4$ ) | 46.0      | 43.0 ( $\geq 49$ ) | 1.5              | 1.2 ( $\geq 4.0$ ) | NR          | NR                 | NR              | NR                 |
|          | Ulnar    | 3.5       | 3.6 ( $\leq 3.3$ ) | 49.0      | 45.0 ( $\geq 49$ ) | 1.7              | 2.0 ( $\geq 6.0$ ) | NR          | NR                 | NR              | NR                 |
|          | Tibial   | 7.8       | 6.7 ( $\leq 5.8$ ) | 34.0      | 34.0 ( $\geq 41$ ) | 3.0              | 1.9 ( $\geq 4.0$ ) |             |                    |                 |                    |
|          | Peroneal | 4.6       | 5.9 ( $\leq 6.5$ ) | 33.0      | 31.0 ( $\geq 44$ ) | 1.7              | 2.2 ( $\geq 2.0$ ) |             |                    |                 |                    |
|          | Sural    |           |                    |           |                    |                  |                    | NR          | NR                 | NR              | NR                 |
| D 6.146  | Median   | 3.8       | 3.7 ( $\leq 4.4$ ) | 56.0      | 61.0 ( $\geq 49$ ) | 6.1              | 8.1 ( $\geq 4.0$ ) | 35.0        | 35.0 ( $\geq 50$ ) | 10.3            | 10.3 ( $\geq 20$ ) |
|          | Ulnar    | 2.4       | 2.8 ( $\leq 3.3$ ) | 57.0      | 65.0 ( $\geq 49$ ) | 7.6              | 7.5 ( $\geq 6.0$ ) | 37.8        | 35.0 ( $\geq 50$ ) | 11.4            | 12.0 ( $\geq 17$ ) |
|          | Tibial   | 4.5       | 5.6 ( $\leq 5.8$ ) | 47.0      | 41.0 ( $\geq 41$ ) | 1.5              | 0.9 ( $\geq 4.0$ ) |             |                    |                 |                    |
|          | Peroneal | 4.8       | 5.2 ( $\leq 6.5$ ) | 46.0      | 47.0 ( $\geq 44$ ) | 1.8              | 1.2 ( $\geq 2.0$ ) |             |                    |                 |                    |
|          | Sural    |           |                    |           |                    |                  |                    | NR          | NR                 | NR              | NR                 |
| D 6.147  | Median   | 3.9       | 3.7 ( $\leq 4.4$ ) | 56.0      | 57.0 ( $\geq 49$ ) | 5.6              | 5.5 ( $\geq 4.0$ ) | 33.3        | 33.3 ( $\geq 50$ ) | 13.3            | 12.3 ( $\geq 20$ ) |
|          | Ulnar    | 2.5       | 2.6 ( $\leq 3.3$ ) | 60.0      | 61.0 ( $\geq 49$ ) | 8.0              | 7.4 ( $\geq 6.0$ ) | 38.9        | 35.0 ( $\geq 50$ ) | 15.4            | 16.0 ( $\geq 17$ ) |
|          | Tibial   | 6.2       | 5.2 ( $\leq 5.8$ ) | 47.0      | 45.0 ( $\geq 41$ ) | 1.1              | 1.8 ( $\geq 4.0$ ) |             |                    |                 |                    |
|          | Peroneal | 5.5       | 6.0 ( $\leq 6.5$ ) | 38.0      | 37.0 ( $\geq 44$ ) | 1.2              | 0.8 ( $\geq 2.0$ ) |             |                    |                 |                    |
|          | Sural    |           |                    |           |                    |                  |                    | NR          | NR                 | NR              | NR                 |
| D 6.177  | Median   | 3.8       | 4.2 ( $\leq 4.4$ ) | 55.0      | 54.0 ( $\geq 49$ ) | 5.5              | 5.8 ( $\geq 4.0$ ) | NR          | NR                 | NR              | NR                 |
|          | Ulnar    | 2.6       | 2.9 ( $\leq 3.3$ ) | 59.0      | 58.0 ( $\geq 49$ ) | 8.5              | 7.9 ( $\geq 6.0$ ) | NR          | NR                 | NR              | NR                 |
|          | Tibial   | 5.3       | 4.5 ( $\leq 5.8$ ) | 45.0      | 44.0 ( $\geq 41$ ) | 1.2              | 1.8 ( $\geq 4.0$ ) |             |                    |                 |                    |
|          | Peroneal | 5.6       | 5.6 ( $\leq 6.5$ ) | 45.0      | 47.0 ( $\geq 44$ ) | 5.0              | 5.0 ( $\geq 2.0$ ) |             |                    |                 |                    |
|          | Sural    |           |                    |           |                    |                  |                    | NR          | NR                 | NR              | NR                 |
| D 6.178  | Median   | 5.3       | 5.0 ( $\leq 4.4$ ) | 46.0      | 40.0 ( $\geq 49$ ) | 5.0              | 4.1 ( $\geq 4.0$ ) | NR          | NR                 | NR              | NR                 |
|          | Ulnar    | 4.2       | 4.0 ( $\leq 3.3$ ) | 41.0      | 47.0 ( $\geq 49$ ) | 6.1              | 6.7 ( $\geq 6.0$ ) | 41.0        | 43.0 ( $\geq 50$ ) | 5.3             | 6.8 ( $\geq 17$ )  |
|          | Tibial   | 7.9       | 8.0 ( $\leq 5.8$ ) | NR        | NR ( $\geq 41$ )   | 0.3              | 0.6 ( $\geq 4.0$ ) |             |                    |                 |                    |
|          | Peroneal | 6.9       | NR ( $\leq 6.5$ )  | 37.0      | NR ( $\geq 44$ )   | 0.3              | NR ( $\geq 2.0$ )  |             |                    |                 |                    |
|          | Sural    |           |                    |           |                    |                  |                    | NR          | NR                 | NR              | NR                 |
| EF1 5.46 | Median   | 4.5       | 3.8 ( $\leq 4.4$ ) | 47.0      | 49.0 ( $\geq 49$ ) | 6.0              | 4.0 ( $\geq 4.0$ ) | NR          | NR                 | NR              | NR                 |
|          | Ulnar    | 2.7       | 2.3 ( $\leq 3.3$ ) | 62.0      | 58.0 ( $\geq 49$ ) | 7.5              | 7.0 ( $\geq 6.0$ ) | 39.0        | 39.0 ( $\geq 50$ ) | 10.5            | 9.5 ( $\geq 17$ )  |
|          | Tibial   | 3.4       | 4.0 ( $\leq 5.8$ ) | 46.0      | 47.0 ( $\geq 41$ ) | 3.0              | 3.3 ( $\geq 4.0$ ) |             |                    |                 |                    |
|          | Peroneal | 5.0       | 4.0 ( $\leq 6.5$ ) | 45.0      | 46.0 ( $\geq 44$ ) | 0.8              | 1.1 ( $\geq 2.0$ ) |             |                    |                 |                    |
|          | Sural    |           |                    |           |                    |                  |                    | NR          | NR                 | NR              | NR                 |

Normal adult values in parenthesis [1]; NR, not recordable.
